# Supplementary material for: Temporal variations in the hygroscopicity and mixing state of black carbon aerosols in a polluted megacity area
Source: Copernicus journal article supplement (doi:10.5194/acp-18-15201-2018), 2018-10-23
Supplement: Supplementary file 1 [file acp-18-15201-2018-supplement.pdf]

Supplement of Atmos. Chem. Phys., 18, 15201–15218, 2018  
<https://doi.org/10.5194/acp-18-15201-2018-supplement>  
© Author(s) 2018. This work is distributed under  
the Creative Commons Attribution 4.0 License.

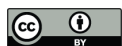

*Supplement of*

## **Temporal variations in the hygroscopicity and mixing state of black carbon aerosols in a polluted megacity area**

**Kangning Li et al.**

*Correspondence to:* Xiaofei Wang ([xiaofeiwang@fudan.edu.cn](mailto:xiaofeiwang@fudan.edu.cn)) and Xin Yang ([yangxin@fudan.edu.cn](mailto:yangxin@fudan.edu.cn))

The copyright of individual parts of the supplement might differ from the CC BY 4.0 License.

1 **Supplementary information**

2

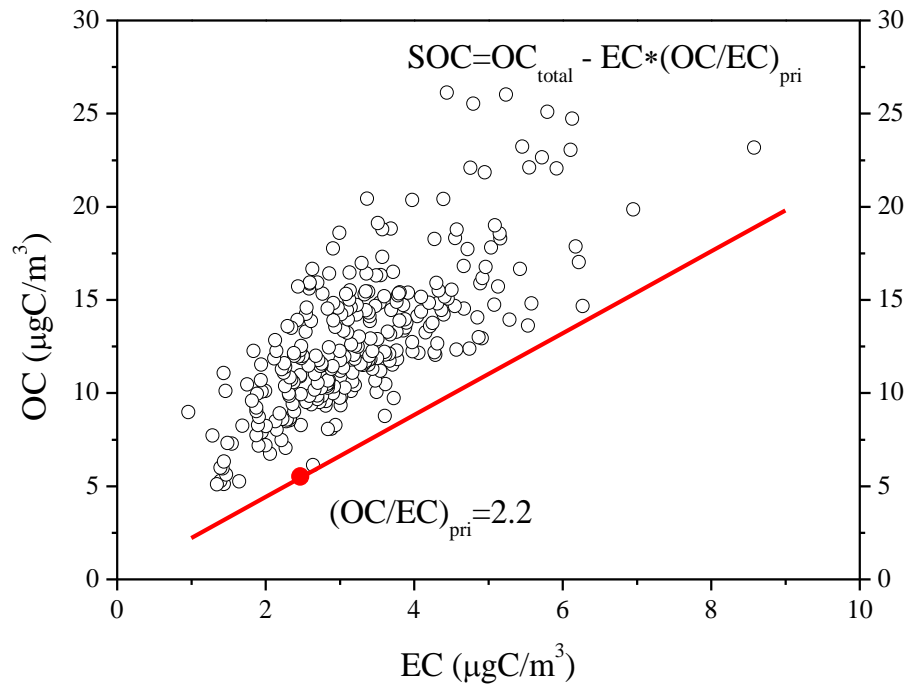

3  
4

5 **Figure S1.** The scattering plot for the measured OC and EC concentration. The red  
6 line represents the minimum value of OC/EC ratio.

7

8

9

10

11

12

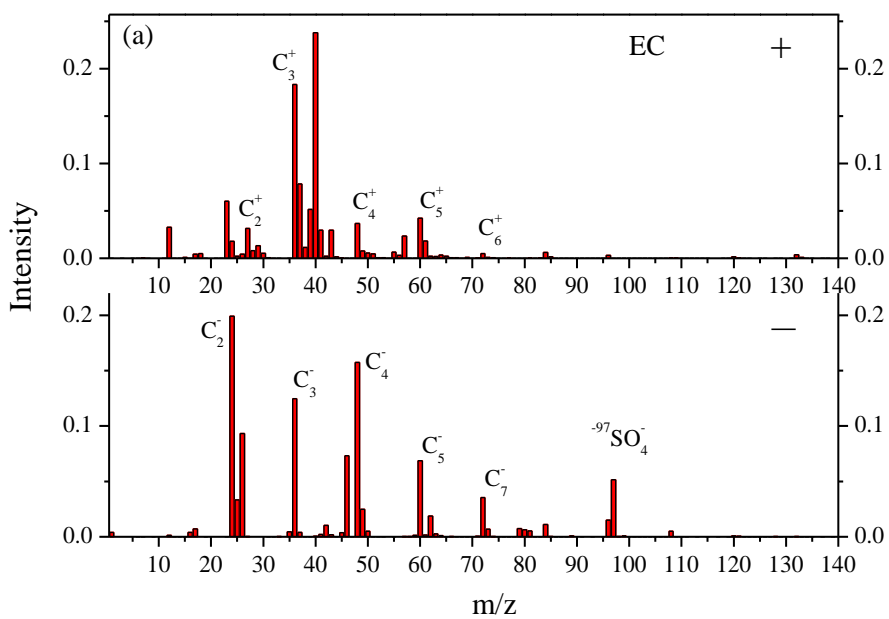

13

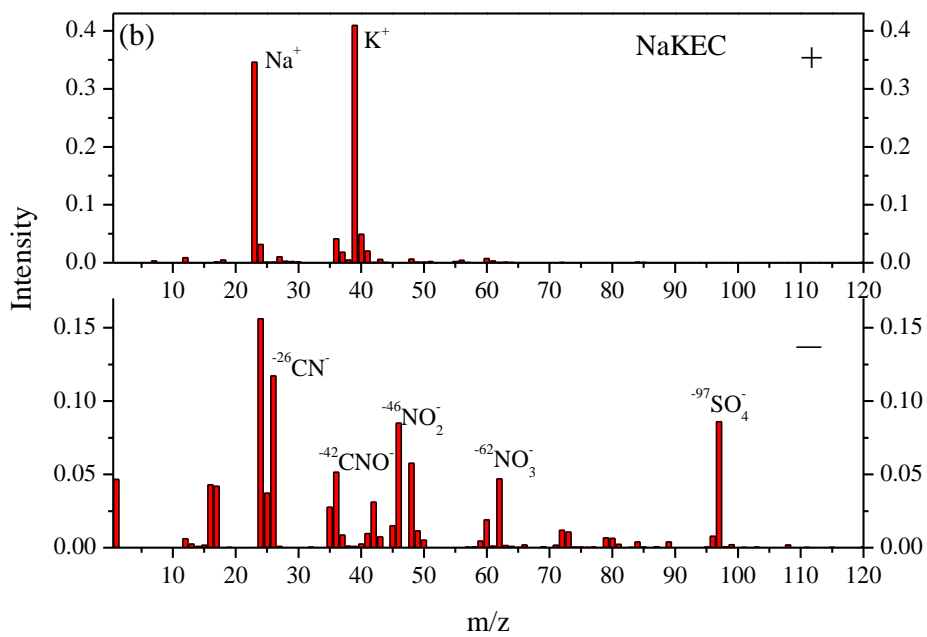

14

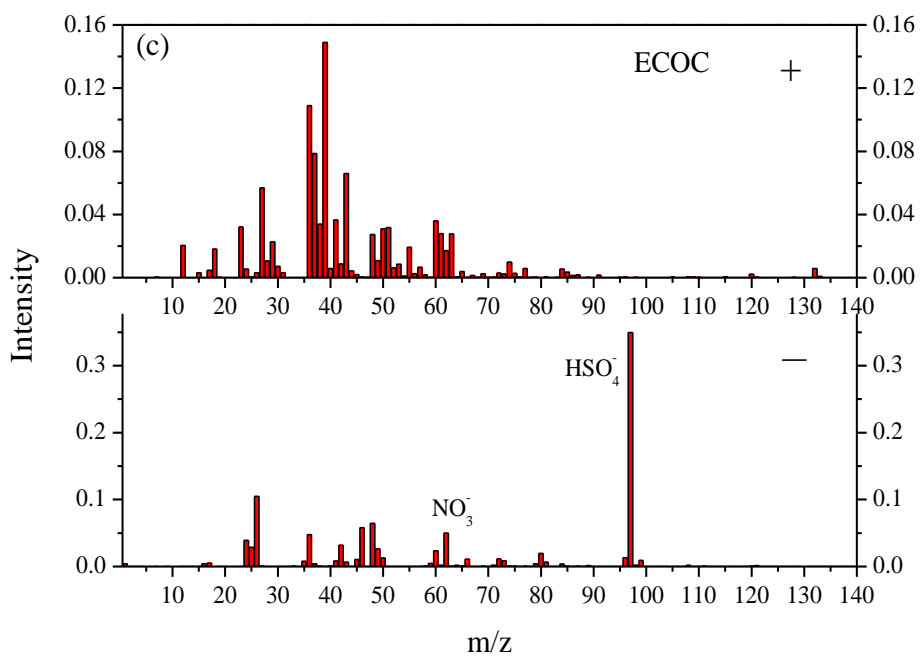

15

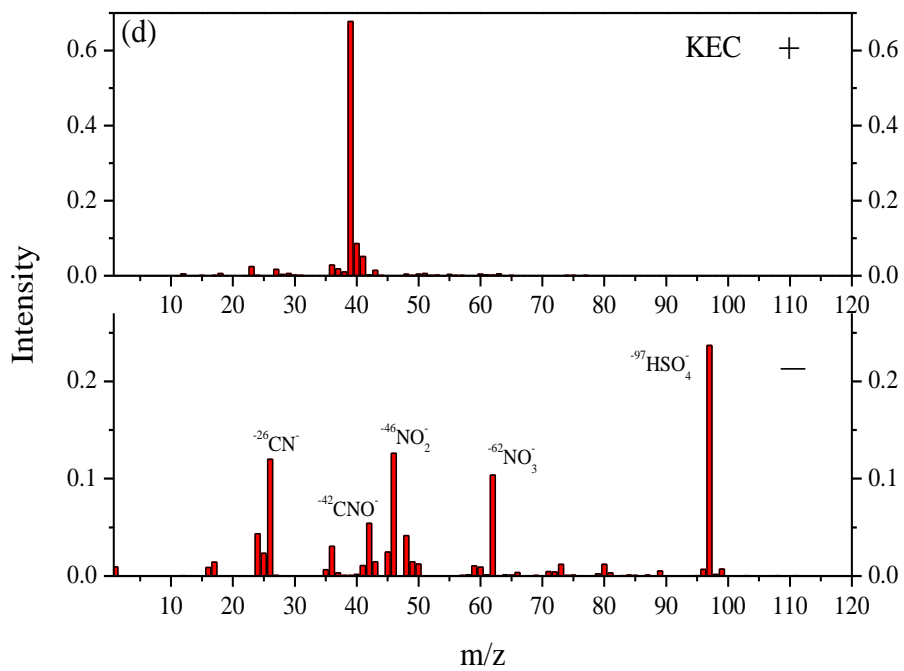

16

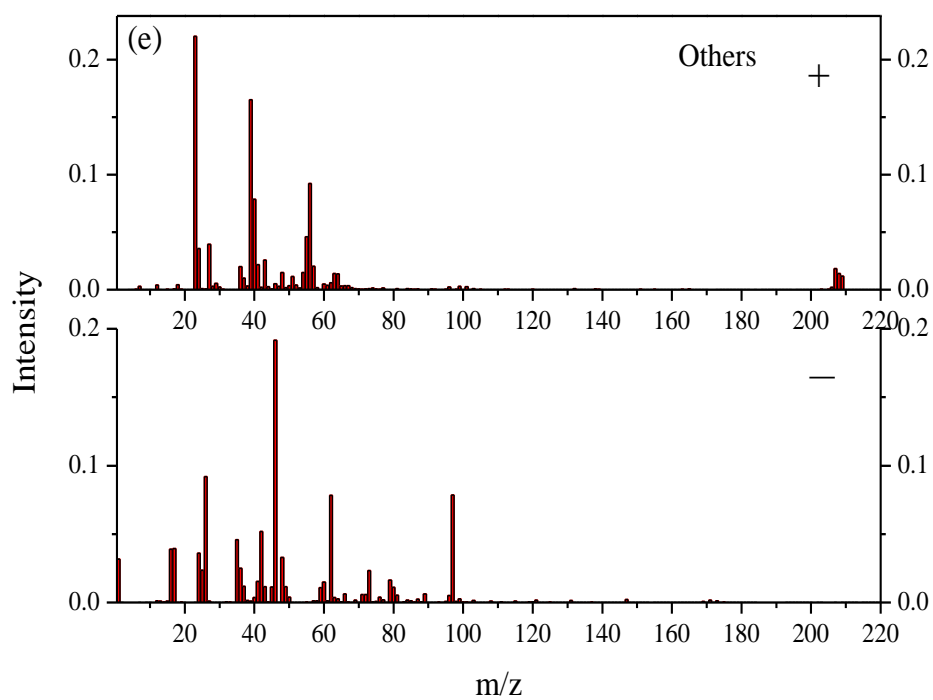

17

18 **Figure S2.** Averaged mass spectra of different types of BC-containing particles: (a)  
19 EC; (b) NaKEC; (c) ECOC; (d) KEC; (e) Others (the unit for the intensity is  
20 arbitrary).

21

22

23

24

25

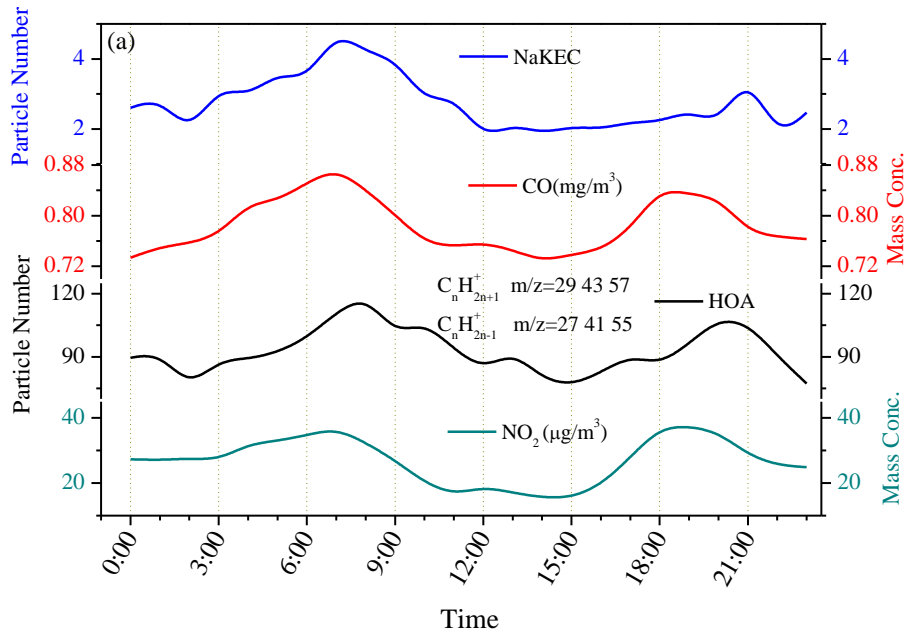

26

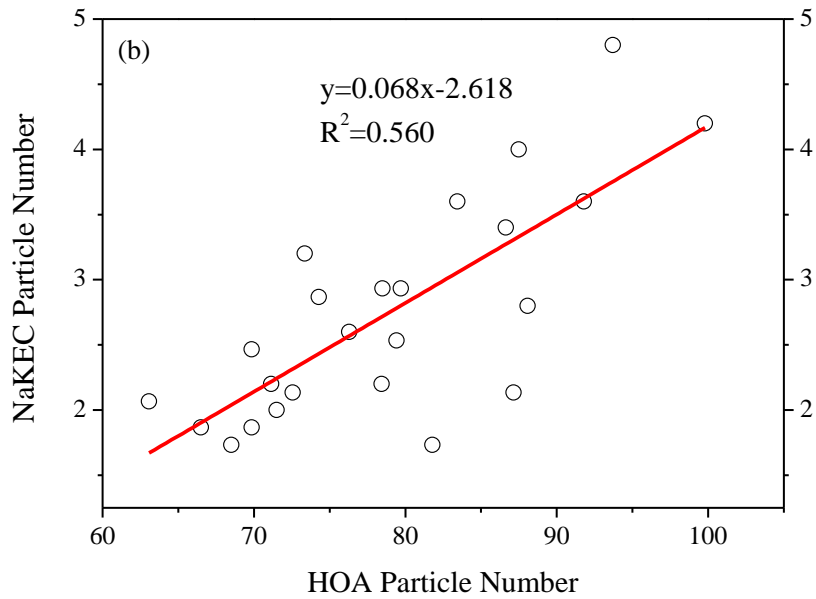

27

28 **Figure S3.** (a) Diurnal variation of NaKEC and HOA particle number sampled by  
 29 SPAMS, as well as CO and NO<sub>2</sub> concentrations; (b) Correlation between NaKEC and  
 30 HOA particles.

31

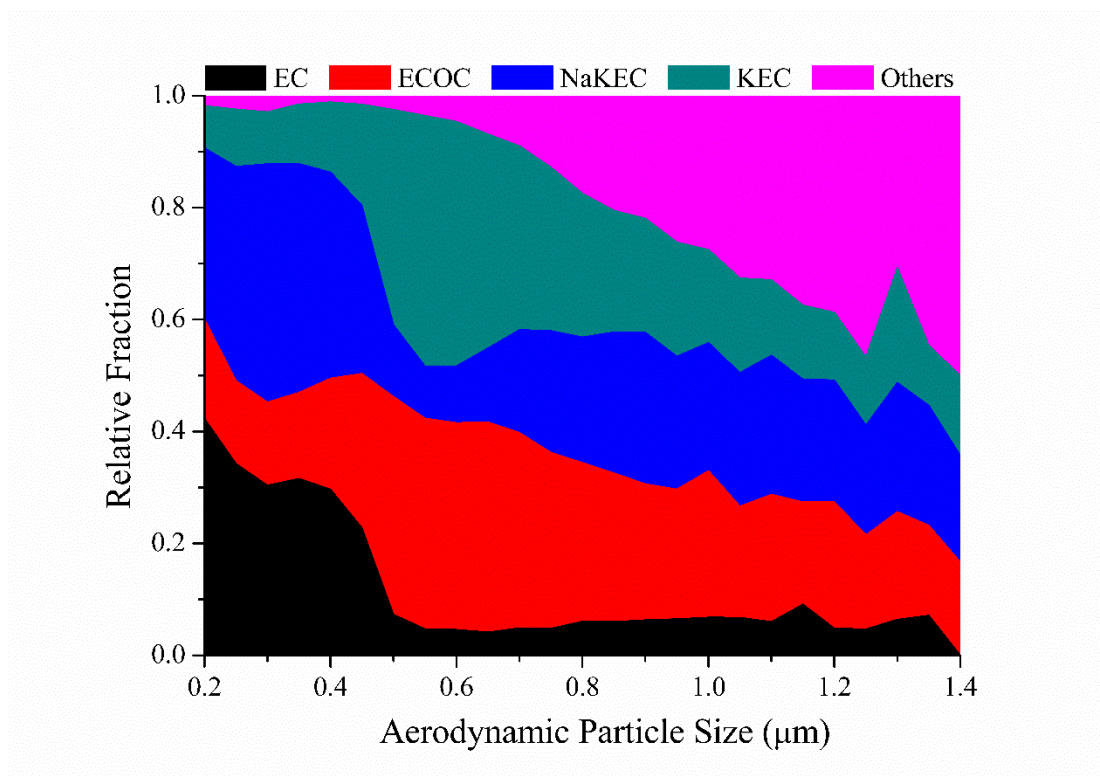

32

33 **Figure S4.** Relative fractions of five particle types as a function of particle size  
34 measured by SPAMS.

35

36

37

38

39

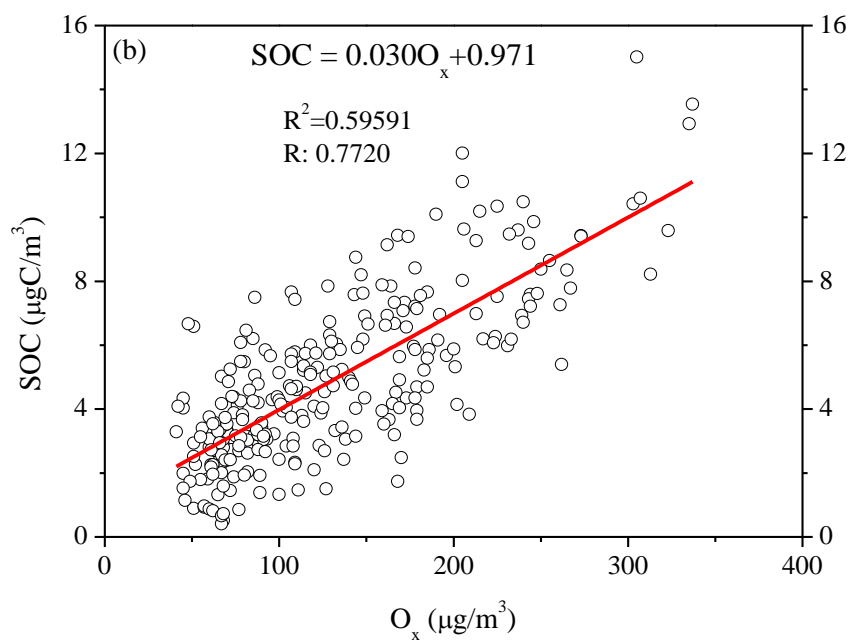

40

41

**Figure S5.** Linear correlation between SOC and  $O_x$  concentration.
